# Supplementary material for: In situ photo-assisted deposition of MoS2 electrocatalyst onto zinc cadmium sulphide nanoparticle surfaces to construct an efficient photocatalyst for hydrogen generation
Source: Royal Society of Chemistry journal article supplement (doi:10.1039/c2nr34037b), 2013-01-01
Supplement: c2nr34037b.pdf [file c2nr34037b.pdf]

## Supporting Information

### ***In-situ* photo-assisted deposition of MoS<sub>2</sub> electrocatalyst onto Zinc-Cadmium-Sulphide nanoparticle surface to construct efficient photocatalyst for hydrogen generation**

Mai Nguyen,<sup>a</sup> Phong D. Tran,<sup>\*a</sup> Stevin S. Pramana,<sup>b,c</sup> Rui Lin Lee,<sup>a</sup> Sudip K. Batabyal,<sup>a</sup> Nripan Mathews,<sup>b</sup> Lydia H. Wong,<sup>\*a,b</sup> Michael Graetzel<sup>d,e</sup>

<sup>a</sup>*Energy Research Institute @ Nanyang Technological University (ERI@N), Singapore; Email: [dptran@ntu.edu.sg](mailto:dptran@ntu.edu.sg)*

<sup>b</sup>*School of Materials Science and Engineering, Nanyang Technological University, Singapore; Email: [lydiawong@ntu.edu.sg](mailto:lydiawong@ntu.edu.sg)*

<sup>c</sup>*Facility of Analysis, Characterization, Testing and Simulation (FACTS), Nanyang Technological University, Singapore*

<sup>d</sup>*Laboratory for Photonics and Interfaces, Ecole Polytechnique Federale de Lausanne, CH-1015 Lausanne, Switzerland*

<sup>e</sup>*Center for Nanostructured Photosystems (CNPS), Nanyang Technological University, Research Techno Plaza, Singapore 637553*

## 1. General

The reagents were all analytical-grade from Sigma Aldrich and used without any further purification.

## 2. Preparation of ternary alloyed $\text{Zn}_x\text{Cd}_{1-x}\text{S}$ nanoparticles

Typically, 0.43 mmol cadmium acetate ( $\text{CdAc}_2 \cdot 2\text{H}_2\text{O}$ ), 0.54 mmol zinc acetate ( $\text{ZnAc}_2 \cdot 2\text{H}_2\text{O}$ ) and 1.33 mmol thioacetamide ( $\text{CH}_3\text{CSNH}_2$ ) were dissolved in 50 mL ethanol to obtain the solution 2% for each sample. The  $\text{Zn}_x\text{Cd}_{1-x}\text{S}$  nanoparticles with a specified x value,  $x = 0.2, 0.4, 0.6$  and  $0.8$ ) were synthesized by mixing the precursors in ethanol at  $50^\circ\text{C}$  for 4 hours. The powders were collected and washed with ethanol twice then annealed in air at  $150^\circ$  for 5 minute.

## 3. Preparation of $\text{Zn}_x\text{Cd}_{1-x}\text{S}$ nanoparticles electrodes

The  $\text{Zn}_x\text{Cd}_{1-x}\text{S}$  (with a specified x value,  $x = 0.2, 0.4, 0.6$  and  $0.8$ ) photoanode on conducting transparent fluorine-doped tin oxide (FTO) had been done by employing a precursor decomposition approach. The precursor was synthesized in ethanol by mixing Zinc acetate, Cadmium acetate and Thioacetamide. This precursor solution was spin-coated onto FTO followed by thermal decomposition at  $150^\circ\text{C}$  for 5 minute.

## 4. Material characterization

### 4.1 Morphology, Chemical Composition, and Structure Characterization

X-Ray powder diffraction (XRD) patterns were obtained using Bruker D8 Advance utilizing  $\text{CuK}\alpha$  radiation with the scanning range from  $20^\circ$  to  $80^\circ$  in  $2\theta$ . The morphologies of

catalysts were investigated by field emission scanning electron microscopy (FESEM, JEOL JSM-7600F) at 5 kV. High resolution transmission electron micrograph and selected area electron diffraction were recorded using JEOL2100F operating at 200keV.

#### 4.2 Electrochemical characterization of $\text{Zn}_x\text{Cd}_{1-x}\text{S}/\text{FTO}$ films

Electrochemical analysis was done using a CHI, model 852 potentiostat. Three electrodes configuration was employed. The working electrode was  $\text{Zn}_x\text{Cd}_{1-x}\text{S}/\text{FTO}$  electrode, the reference electrode was Ag/AgCl, 3M KCl and the counter electrode was a Pt mesh. pH7 phosphate buffer (0.1M) solution was used as electrolyte. 0.01M  $\text{Na}_2\text{S}$  was added when sacrificial electron donor is required. Prior to measurement, electrolyte solution was carefully saturated with research-grade nitrogen gas to eliminate dissolved oxygen. Visible light illumination was provided by employing a 150W Xe lamp and a 420 nm cut-off filter. Light density on  $\text{Zn}_x\text{Cd}_{1-x}\text{S}/\text{FTO}$  working electrode was adjusted to  $100 \text{ mW.cm}^{-2}$ . I-V curves were recorded by employing linear sweep voltammetry with slow scan rate of  $2 \text{ mV.s}^{-1}$ . During measurement, light illumination was manually chopped employing a metal mask placed between the light source and the  $\text{Zn}_x\text{Cd}_{1-x}\text{S}/\text{FTO}$  electrode.

#### 4.3 Photocatalytic $\text{H}_2$ production

Photocatalytic assays were carried out at room temperature in a closed system with outer irradiation. Briefly, 20 mL aqueous solution of  $\text{Na}_2\text{S}$  0.35M/ $\text{Na}_2\text{SO}_3$  0.25M in a 50 mL gas-tight closed schlenk was well degassed by research-grade nitrogen gas for 1h to remove dissolved oxygen. 20 mg of  $\text{Zn}_x\text{Cd}_{1-x}\text{S}$  nanopowder and a pre-determined  $(\text{NH}_4)_2[\text{MoS}_4]$  precursor were added. Before illumination, the reaction mixture was vigorously stirred and further degassed by nitrogen gas for 15 min. The reaction mixture was then irradiated by a

300W Xe lamp (Asahi Spectra, MAX-302) equipped with a 420 nm cut-off filter. Gas in the head-cap of the reactor was manually sampled and analyzed by gas chromatography.

### Supplementary data

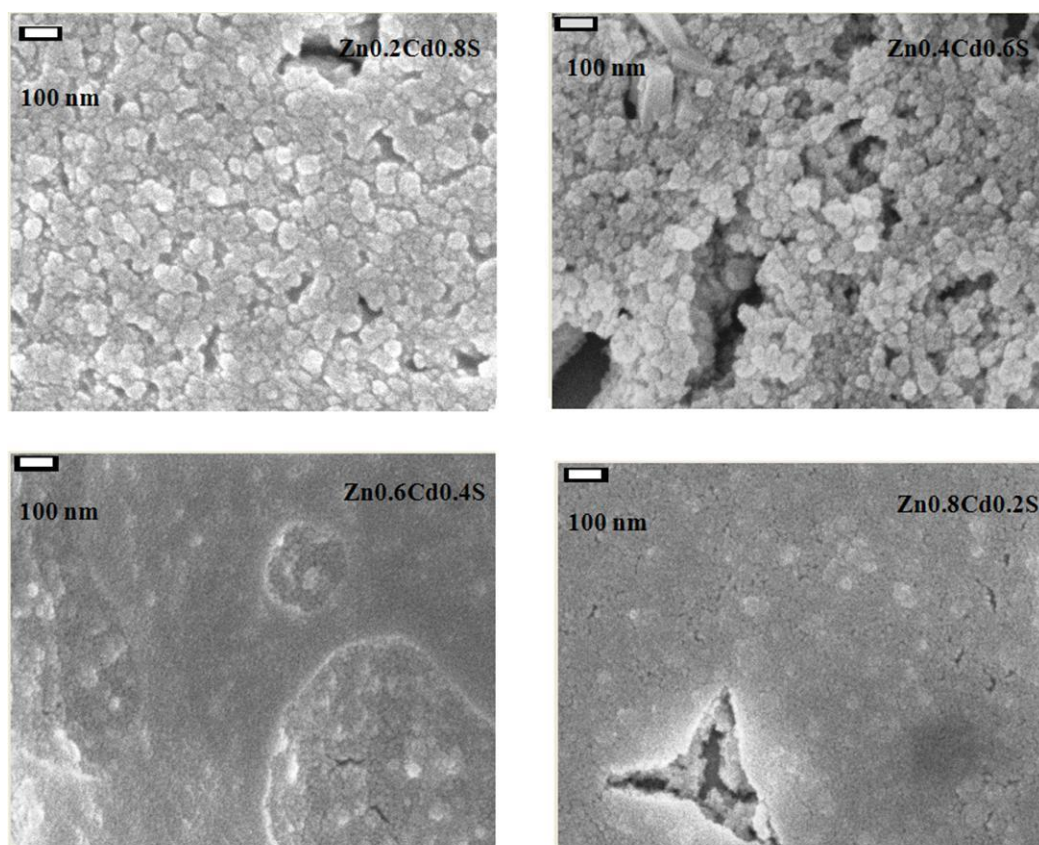

**Figure S1:** *Morphology of  $\text{Zn}_x\text{Cd}_{1-x}\text{S}$  nanoparticles*

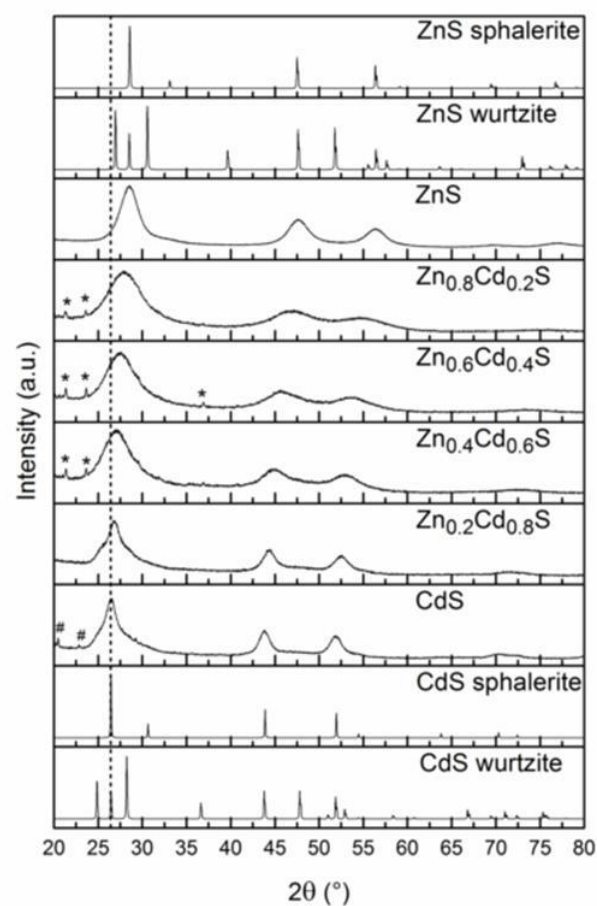

**Figure S2 :** X-ray diffraction patterns of  $\text{Zn}_x\text{Cd}_{1-x}\text{S}$  together with the reported ZnS and CdS sphalerite and wurtzite [1-4]

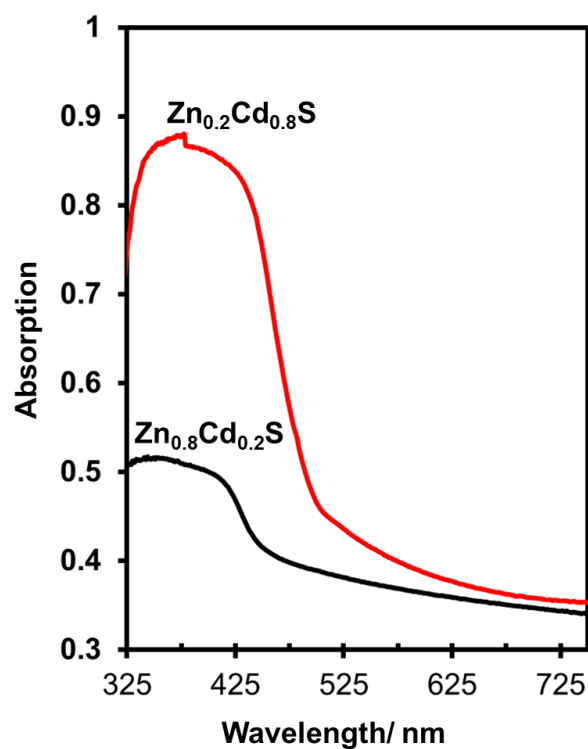

**Figure S3:** Optical properties of  $\text{Zn}_x\text{Cd}_{1-x}\text{S}$  nanoparticles

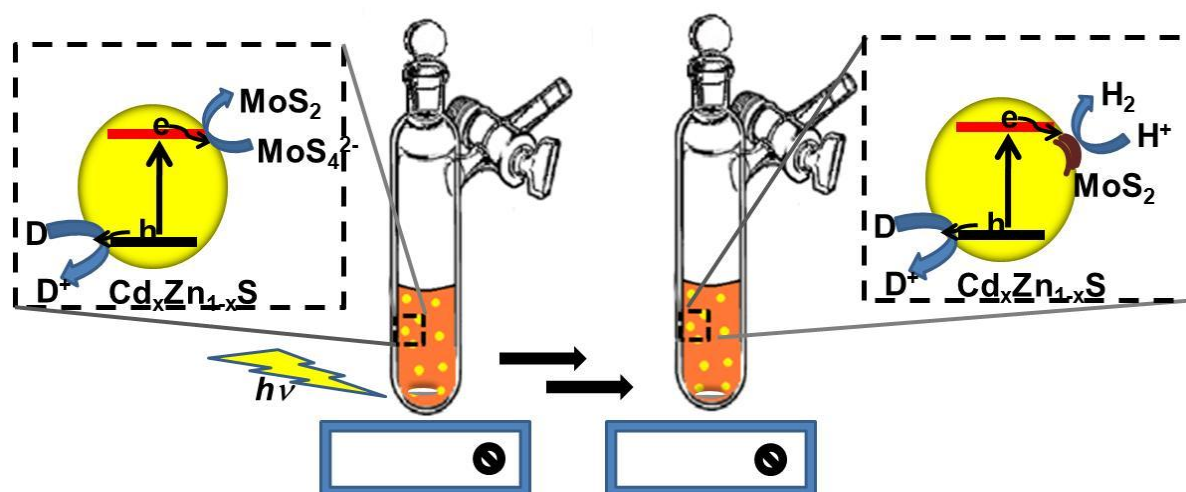

**Figure S4:** Schematic presentation of in-situ photo-assisted deposition of  $\text{MoS}_2$  co-catalyst on  $\text{Zn}_x\text{Cd}_{1-x}\text{S}$  semiconductor and  $\text{H}_2$  photo-evolution from an aqueous solution catalyzed by  $\text{Zn}_x\text{Cd}_{1-x}\text{S}/\text{MoS}_2$  photocatalyst

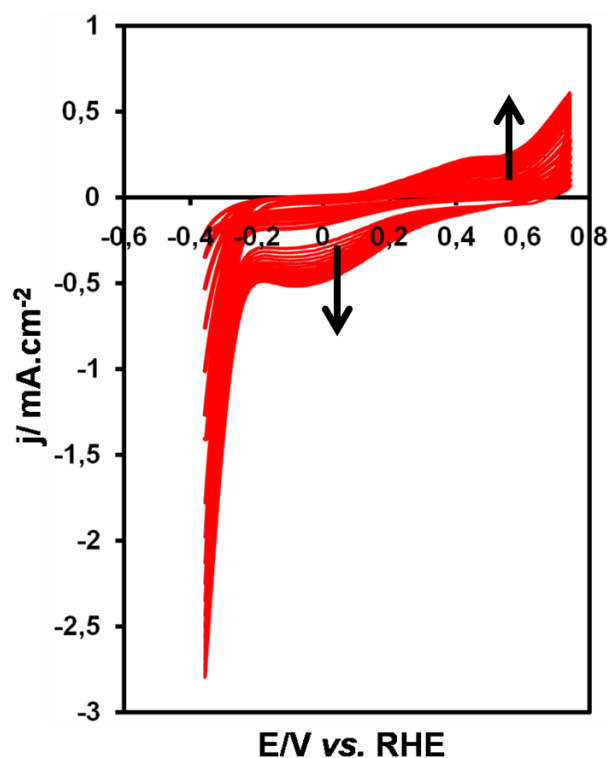

**Figure S5:** Typical consecutive cyclic voltammograms recorded on a carbon glassy electrode for a 0.5mM  $(\text{NH}_4)_2[\text{MoS}_4]$  solution in pH7 phosphate buffer. Potential scan rate was  $50\text{mV.s}^{-1}$ .

On a fluorine-doped tin oxide (FTO) electrode, deposition of  $\text{MoS}_2$  amorphous thin film was visible after repeating 10 potential cycles or by holding this FTO electrode at 0V vs. RHE for 20 min.

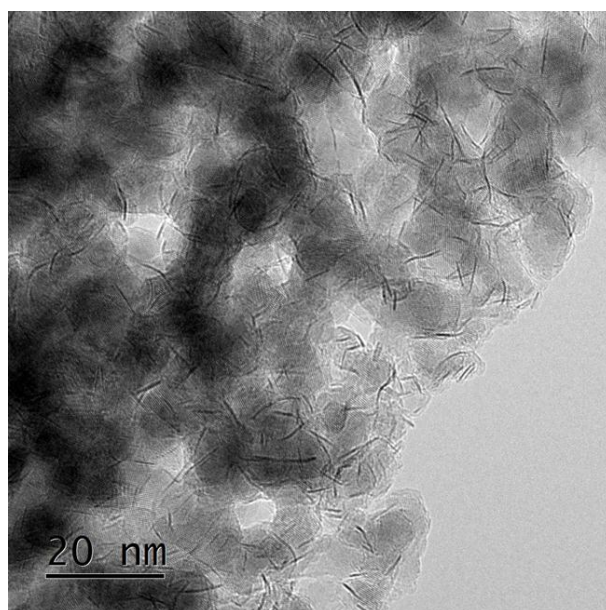

**Figure S6:** TEM image recorded on a  $\text{Zn}_{0.2}\text{Cd}_{0.8}\text{S}/\text{MoS}_2$  3% photocatalyst

**Table S1 :** Surface area measured for different  $\text{Zn}_x\text{Cd}_{1-x}\text{S}$  nanoparticles

| Catalysts                                | BET Surface Area ( $\text{m}^2.\text{g}^{-1}$ ) | Langmuir Surface Area ( $\text{m}^2.\text{g}^{-1}$ ) |
|------------------------------------------|-------------------------------------------------|------------------------------------------------------|
| $\text{Zn}_{0.2}\text{Cd}_{0.8}\text{S}$ | 29.2546                                         | 40.6323                                              |
| $\text{Zn}_{0.4}\text{Cd}_{0.6}\text{S}$ | 51.1519                                         | 72.8227                                              |
| $\text{Zn}_{0.6}\text{Cd}_{0.4}\text{S}$ | 49.0176                                         | 68.3543                                              |
| $\text{Zn}_{0.8}\text{Cd}_{0.2}\text{S}$ | 5.5090                                          | 7.64955                                              |

## References

1. C. Hua, R. D. Pike, R. Kershaw, K. Dwight. A. Wold, *Journal of Solid State Chemistry* 1992, **101**, 115-118.
2. M. K. Rabadanov, *Kristallografiya* 1995, **40**, 21-27.
3. M. Ikeda, H. Wada, T. Wada, T. Hirao, *Japanese Journal of Applied Physics*, Part 1 1994, **33**, 4540-4545.
4. D. Rodic, V. Spasojevic, A. Bajorek, P. Oennerud, *Journal of Magnetism and Magnetic Materials* 1996, **152**, 159-164
